# Supplementary material
Source: publisher site journal article supplement (https://www.dovepress.com/article/505526)

**Supporting Information**

**Optimizing Triple-Negative Breast Cancer Therapy via Ultrasound-Enhanced Piezocatalysis for Targeted Chemodrug Release**

*Qingwen Xue1#, Ningning He2,#, Yuxiu Gao1, Xuehui Zhang1, Shuao Li1, Fang Chen1, Chunping Ning1, Xiaoyu Wu2, Jingtong Yao2, Ziheng Zhang2, Shangyong Li1,2,*, Cheng Zhao1,**

1Department of Ultrasound, the Affiliated Hospital of Qingdao University, Qingdao 266003, China

2School of Basic Medicine, Qingdao Medical College, Qingdao University, Qingdao 266003, China

*To whom correspondence should be addressed.

E-mail: zhaochengdr@163.com

[lisy@qdu.edu.cn](mailto:lisy@qdu.edu.cn)

[heningning@qdu.edu.cn](mailto:lisy@qdu.edu.cn)

**Figure Legends**

**Fig. S1.** XRD patterns of BaTiO3 NPs.

**

**

**Fig. S2.** The picture of DBRL nanoparticles distributed in different media.


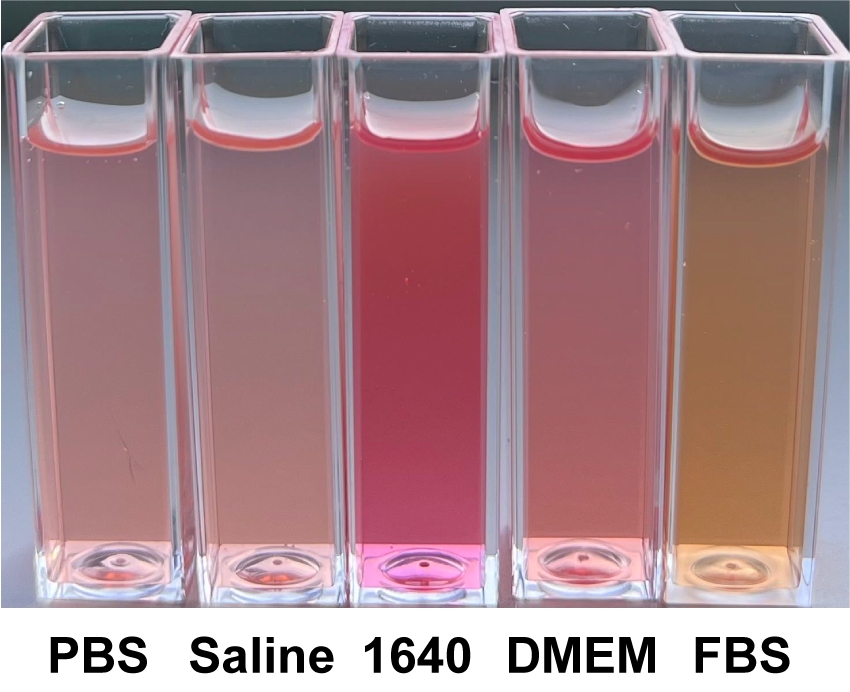


**Fig. S3.** Viability of MCF-10A cells after co-incubation with DBRL NPs.


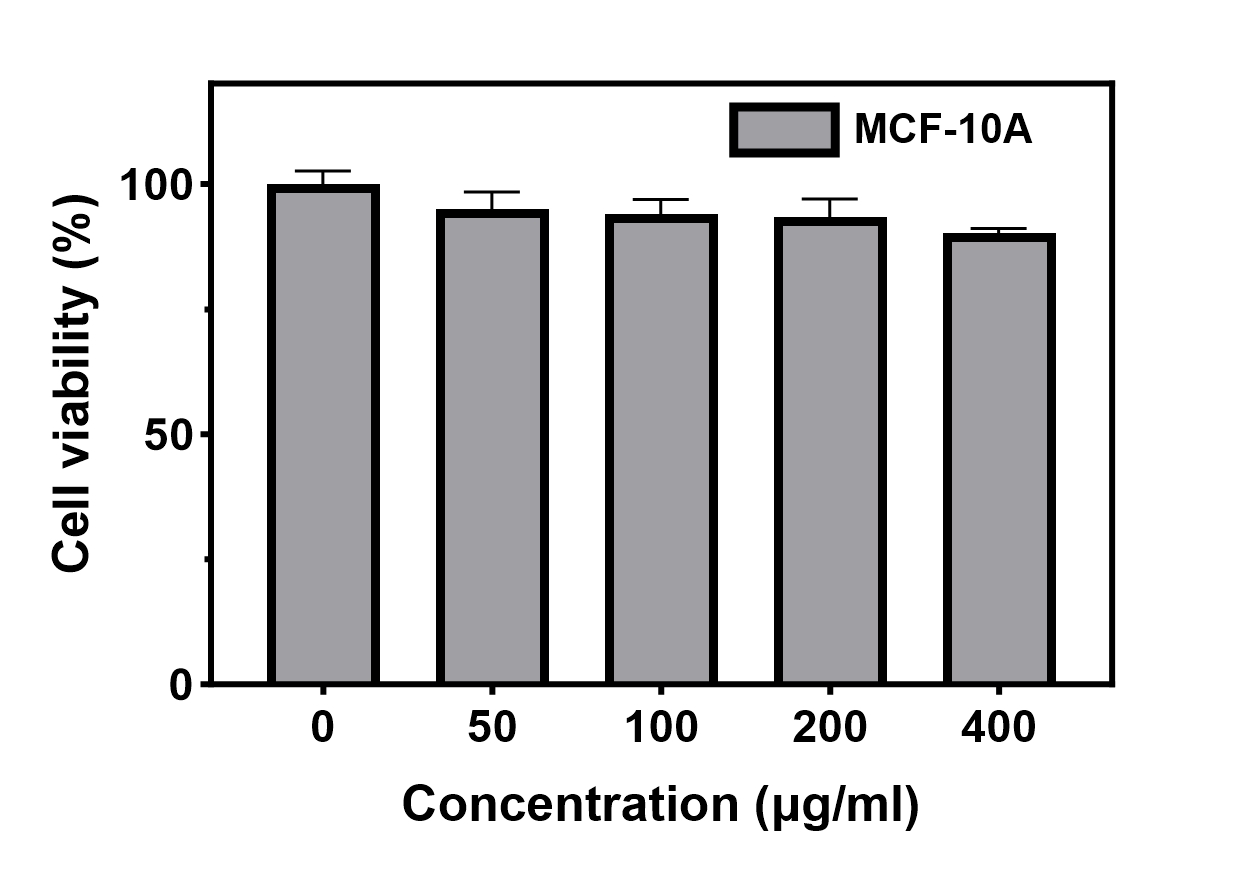


**Fig. S4.** Cell viabilities of MDA-MB-231 cells under different treatments (n = 4).


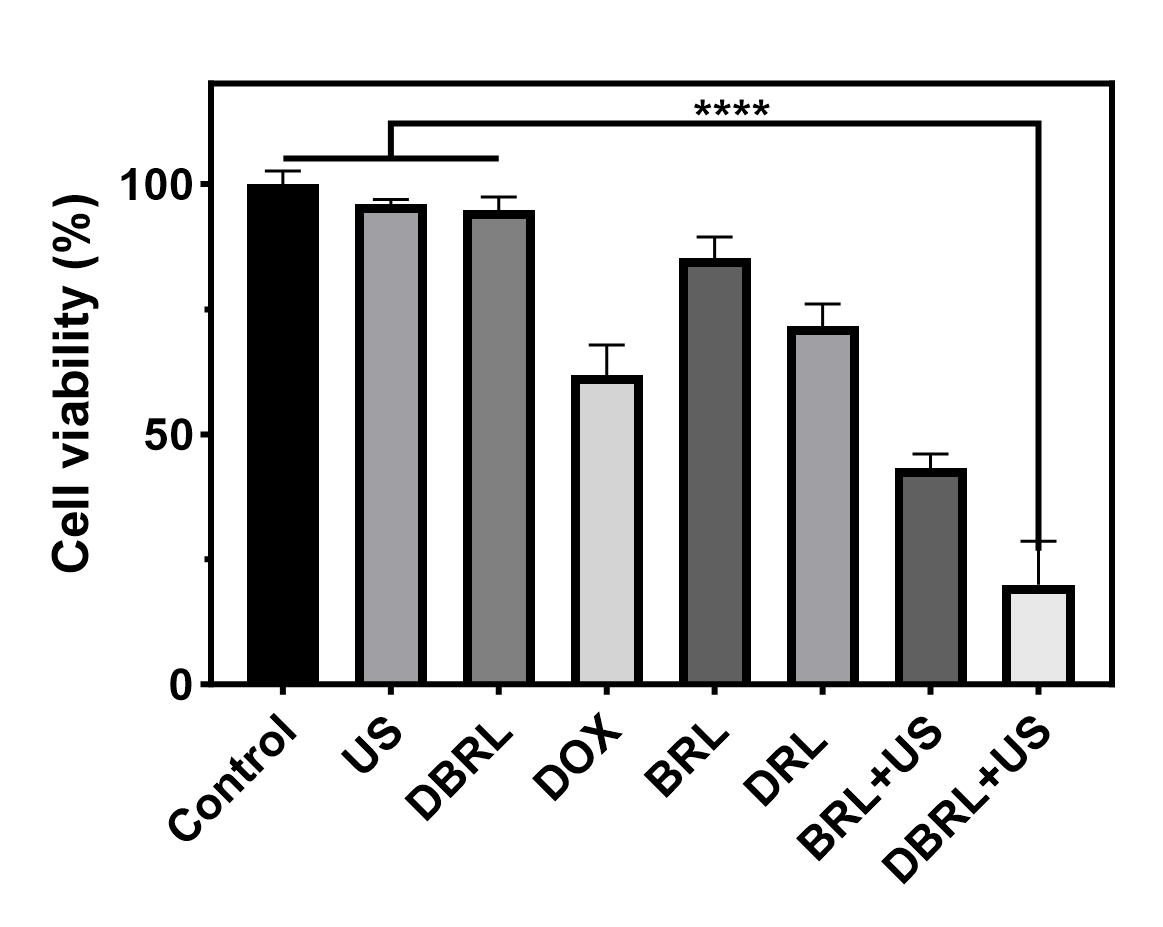


**Fig. S5.** H&E staining images of main organs of different groups after 14 days treatments (scale bar: 100 μm).


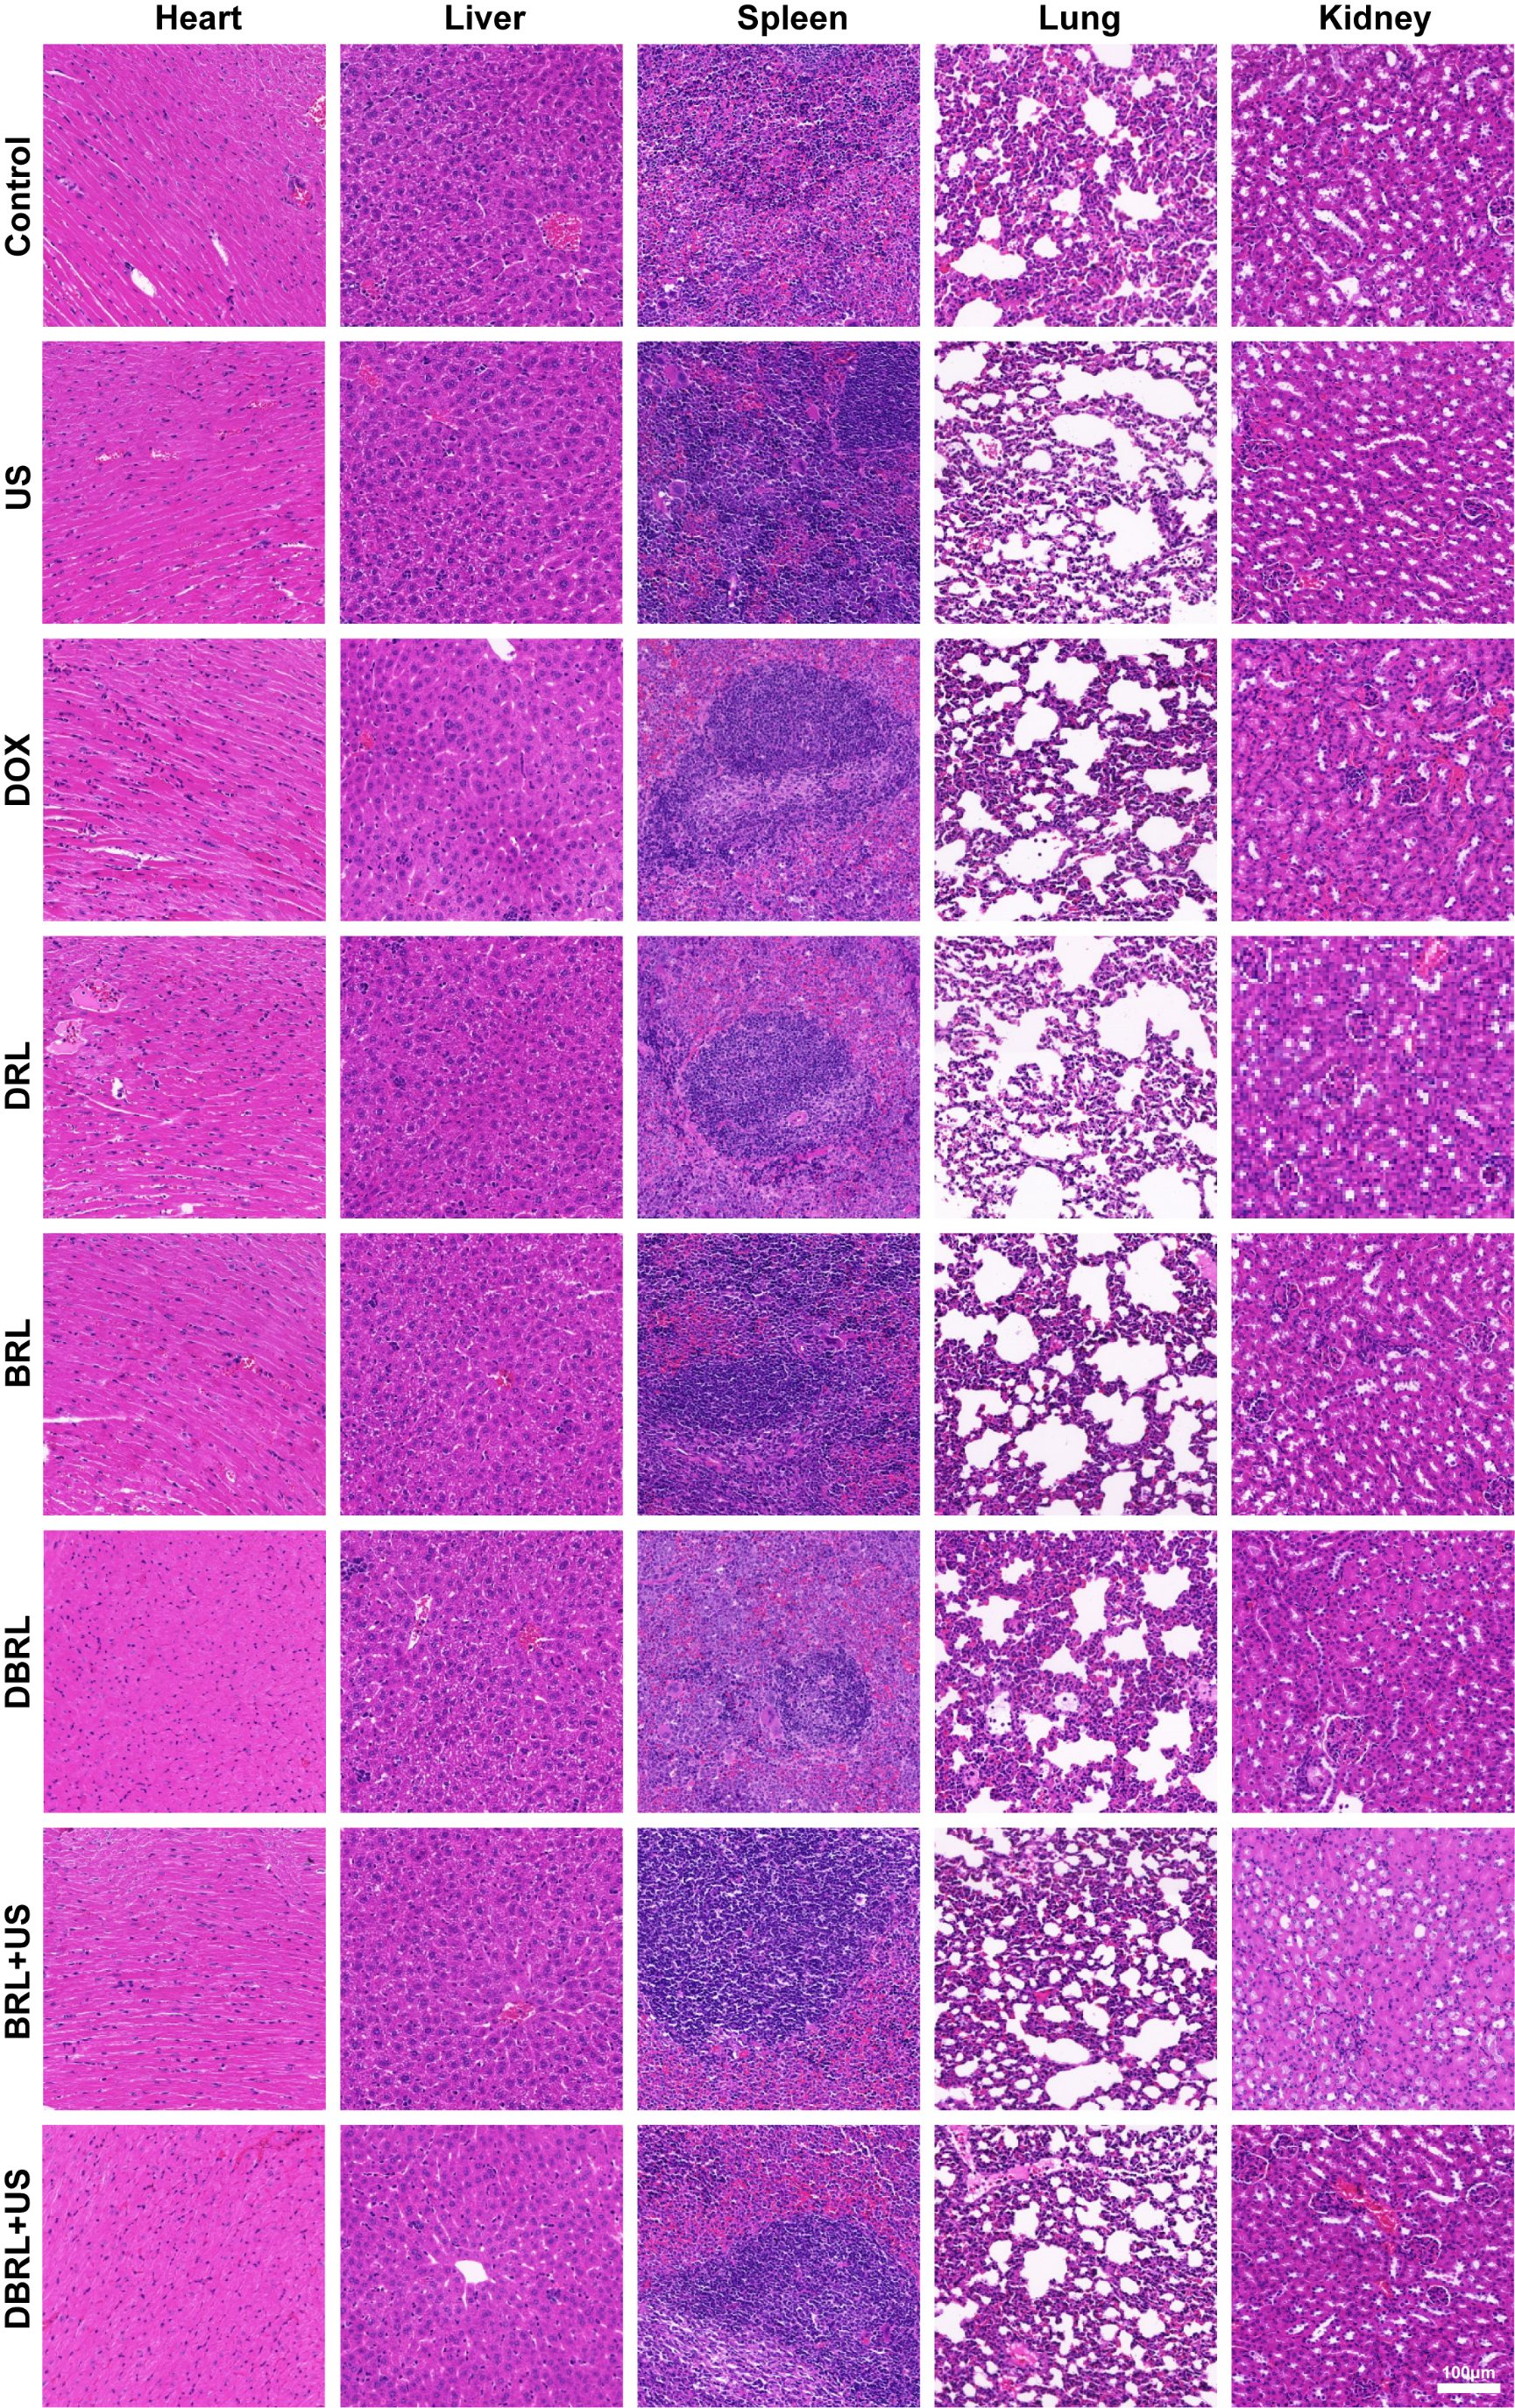

Supplement: Supplementary file 1 [file get_supplementary_file.php]
